# Supplementary material for: Replication of Brucella abortus and Brucella melitensis in fibroblasts does not require Atg5-dependent macroautophagy
Source: PubMed Central journal article supplement (PMC4159544; doi:10.1186/s12866-014-0223-5), 2014-09-02
Supplement: 12866_2014_223_MOESM1_ESM.pdf [file 12866_2014_223_MOESM1_ESM.pdf]

## Additional file

### Figure S1

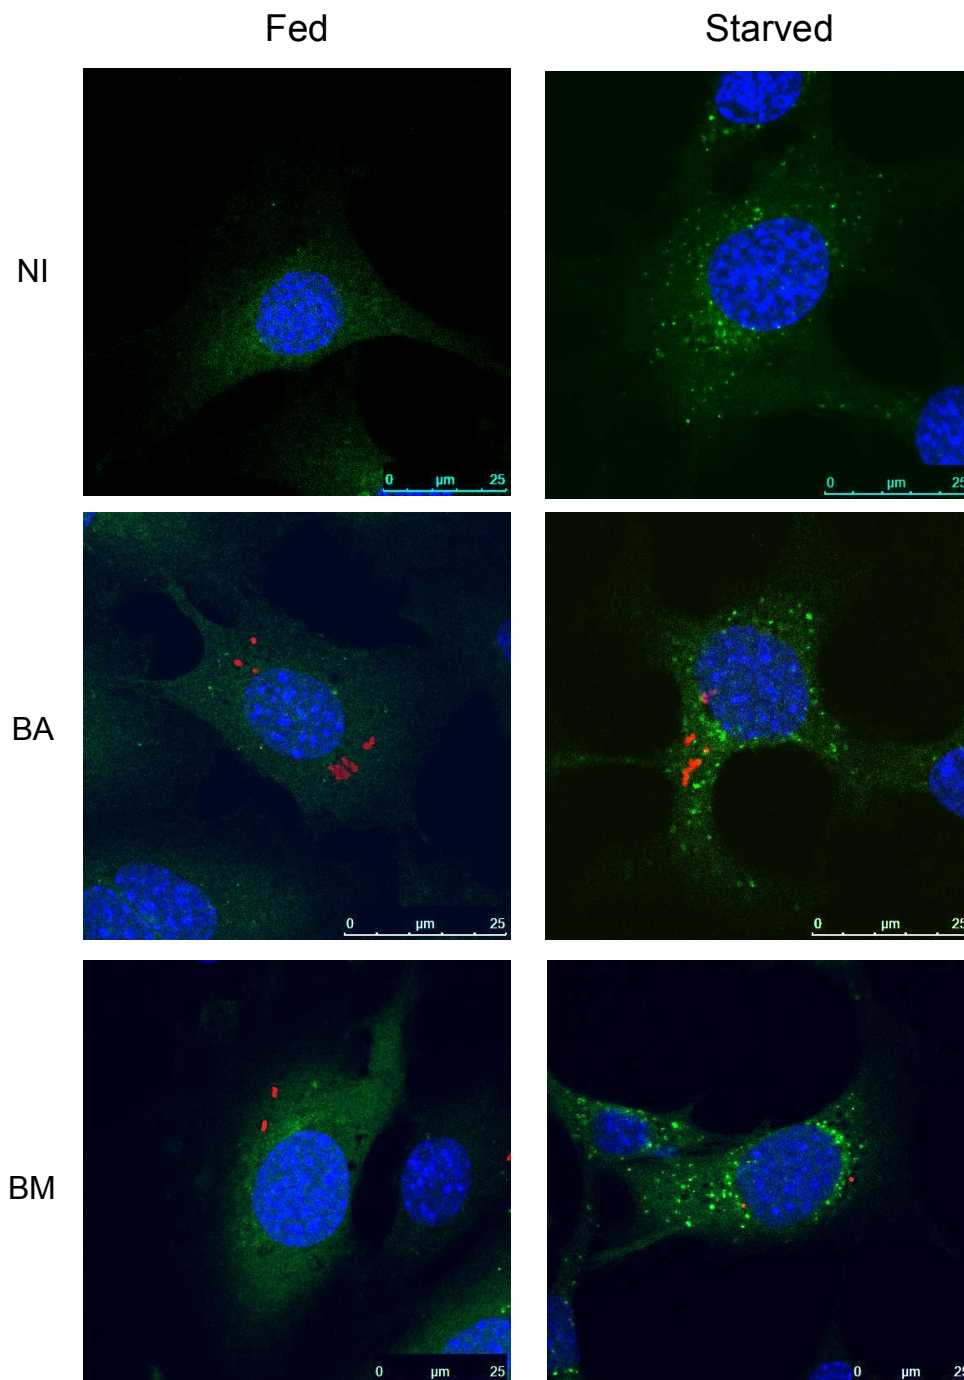

**Figure S1.** GFP-LC3 labelling in WT MEFs infected or not with *B. abortus* or *B. melitensis*. WT MEFs stably expressing GFP-LC3 were maintained under normal conditions (left) or under starved conditions (right). NI, BA and BM correspond to non infected cells, cells infected with *B. abortus* and cells infected with *B. melitensis*, respectively. MEFs were fixed at 10 h p.i. Bacteria were detected with a monoclonal anti-LPS antibody and an anti-mouse IgG Texas Red-conjugated secondary antibody. Nuclei were stained with DAPI.
